# Supplementary material for: Global stratospheric measurements of the isotopologues of methane from the Atmospheric Chemistry Experiment Fourier transform spectrometer
Source: Copernicus journal article supplement (doi:10.5194/amt-9-1095-2016), 2016-03-18
Supplement: Supplementary file 1 [file amt-9-1095-2016-supplement.zip]

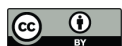

## *Supplement of*

# **Global stratospheric measurements of the isotopologues of methane from the Atmospheric Chemistry Experiment Fourier transform spectrometer**

**E. M. Buzan et al.**

*Correspondence to:* Eric M. Buzan (ebuzan@odu.edu)

- amt-9-1095-2016-supplement-title-page.pdf
- ACE\_CH4\_q1\_DJF.txt
- ACE\_CH4\_q2\_MAM.txt
- ACE\_CH4\_q3\_JJA.txt
- ACE\_CH4\_q4\_SON.txt
- ACE\_del13CH4\_q1\_DJF.txt
- ACE\_del13CH4\_q2\_MAM.txt
- ACE\_del13CH4\_q3\_JJA.txt
- ACE\_del13CH4\_q4\_SON.txt
- ACE\_delCH3D\_q1\_DJF.txt
- ACE\_delCH3D\_q2\_MAM.txt
- ACE\_delCH3D\_q3\_JJA.txt
- ACE\_delCH3D\_q4\_SON.txt
- WACCM\_CH4.png
- WACCM\_del13CH34.png
- WACCM\_delCH3D.png
- ch4 microwindows.xlsx
- new CH4 parameters.xlsx

The copyright of individual parts of the supplement might differ from the CC-BY 3.0 licence.
